1 **Title:**

2 Biased gene retention in the face of massive nuclear introgression obscures species relationships

3 **Authors:**

4 Evan S. Forsythe<sup>1</sup>, Andrew D. L. Nelson<sup>1</sup>, Mark A. Beilstein<sup>1\*</sup>

5 **Affiliations:**

6 <sup>1</sup>School of Plant Sciences, University of Arizona, Tucson, AZ 85721, USA.

7 **Corresponding Author:**

8 Mark A. Beilstein; 1140 E. South Campus Dr.; Forbes 303; Tucson, AZ 85721; (520) 626-1562;

9 mbeilstein@email.arizona.edu

10 **Keywords:**

11 Introgression | Arabidopsis | Phylogenomics | Cytonuclear interactions

12

13 **Abstract:**

14 Phylogenomic analyses are recovering previously hidden histories of hybridization, revealing the  
15 genomic consequences of these events on the architecture of extant genomes. We exploit a suite  
16 of genomic resources to show that introgressive hybridization occurred between close relatives  
17 of *Arabidopsis*, impacting our understanding of species relationships in the group. The  
18 composition of introgressed and retained genes indicates that selection against incompatible  
19 cytonuclear and nuclear-nuclear interactions likely acted during introgression, while neutral  
20 processes also contributed to genome composition through the retention of ancient haplotype  
21 blocks. We also developed a divergence-based test to distinguish donor from recipient lineages  
22 without the requirement of additional taxon-sampling. Finally, to our great surprise, we find that  
23 cytonuclear discordance appears to have arisen via extensive nuclear, rather than cytoplasmic,  
24 introgression, meaning that most of the genome was displaced during introgression, while only a  
25 small proportion of native alleles were retained.

26 **Significance:**

27 Hybridization can lead to the transfer of genes across species boundaries, impacting the  
28 evolution of the recipient species through a process known as introgression (IG). IG can facilitate  
29 sharing of adaptive alleles but can also result in deleterious combinations of incompatible foreign  
30 alleles (i.e. epistatic incompatibility). How hybrids overcome these epistatic hurdles remains an  
31 open question. Here, we characterize IG in *Arabidopsis* and its closest relatives. Interestingly,  
32 our analyses favor an evolutionary scenario in which the vast majority of nuclear genes were  
33 displaced by foreign alleles during the evolution of *Capsella* and *Camelina*, obscuring species  
34 relationships. Simultaneously, a subset of nuclear genes resisted displacement, thereby

35 minimizing epistatic incompatibilities between the organellar and nuclear genomes, suggesting  
36 one potentially fundamental mechanism for overcoming barriers to hybridization.

### 37 **Background:**

38 Hybridization is a driving force in plant evolution<sup>1</sup>, occurring naturally in ~10% of all  
39 plants, including 22 of the world's 25 most important crops<sup>2</sup>. Botanists have long realized that  
40 through backcrossing to parents, hybrids can serve as bridges for the transfer of genes between  
41 species, a process known as introgression (IG). As more genome sequences become available,  
42 comparative analyses have revealed the watermarks of historical IG events in plant and animal  
43 genomes<sup>3-5</sup>. Cytonuclear discordance is a hallmark of many IG events, occurring, in part,  
44 because nuclear and cytoplasmic DNA differ in their mode of inheritance. In plants, this discord  
45 is often referred to as "chloroplast capture," which has been observed in cases where IG of the  
46 chloroplast genome occurs in the near absence of nuclear IG or via nuclear IG to a maternal  
47 recipient<sup>6</sup>. Moreover, unlinked nuclear and cytoplasmic IG creates an interaction interface for  
48 independently evolving nuclear and cytoplasmic alleles, either of which may have accumulated  
49 mutations that result in incompatibilities with deleterious effects when they are united in hybrids.  
50 Such incompatibilities could exert a selective pressure that influences which hybrid genotypes  
51 are permissible thereby favoring the co-introgression of alleles for interacting genes<sup>7</sup>.

52 Disentangling IG from speciation is particularly important because IG may facilitate the  
53 transfer of adaptive traits. Robust statistical techniques<sup>5,8-15</sup> have been developed to detect the  
54 signatures of historical introgression (IG) in extant and extinct genomes. While existing  
55 techniques are able to identify the taxa that exchanged genes during IG using a four-taxon  
56 system, most methods do not explicitly distinguish which taxon served as donor and which as  
57 recipient during IG (i.e. polarization of IG directionality), an important distinction considering

58 that IG impacts the evolution of the recipient lineage<sup>4,6</sup>. The existing methods that do polarize IG  
59 are only able to do so when there is a fifth taxon available, which diverged from its sister taxon  
60 involved in IG<sup>11</sup>, prior to the proposed IG event.

61 The wealth of genomic and functional data in *Arabidopsis*<sup>16</sup>, combined with publicly  
62 available genome sequence for 26 species make the plant family Brassicaceae an ideal group for  
63 comparative genomics. Phylogeny of the group has been the focus of numerous studies<sup>17–23</sup>,  
64 providing a robust estimate of its evolutionary history. While the genus *Arabidopsis* is well  
65 circumscribed<sup>20,24</sup>, the identity of its closest relatives remains an open question. Phylogenetic  
66 studies to date recover three monophyletic groups: clade A, including the sequenced genomes of  
67 *A. thaliana*<sup>16</sup> and *A. lyrata*<sup>25</sup>; clade B, including the *B. stricta* genome<sup>26</sup>; and clade C, including  
68 the genomes of *Capsella rubella*, *C. grandiflora*<sup>27</sup>, and *Camelina sativa*<sup>28</sup> (Supplementary  
69 Information). Analyses using nuclear markers strongly support A(BC), which is most often cited  
70 as the species tree<sup>17,19,21–23</sup>. Organellar markers strongly support B(AC)<sup>18,19,29,30</sup> (Fig. 1a-b and  
71 Table S1). The genome sequences listed above can be used to explore the processes underlying  
72 this incongruence.

73 Here, we exploit a suite of genomic resources to explore a putative chloroplast capture  
74 event involving *Arabidopsis* and its closest relatives by inferring gene trees for markers in all  
75 three cellular genomes from six available whole genome sequences. We document cytonuclear  
76 discordance and ask if it arose through IG of organelles or extensive IG of nuclear genes.  
77 Further, using a new divergence-based approach, we ask: Which lineage was the recipient of  
78 introgressed alleles? Finally, we explore the extent to which neutral processes, such as physical  
79 linkage as well as non-neutral processes, such as selection against incompatible alleles at  
80 interacting loci, shaped the recipient genome.

81

82 **Results:**

83 **Gene tree incongruence within and between organelle and nuclear genomes.** We searched  
84 for incongruent histories present within and among nuclear and organellar genomes in  
85 representative species from each clade. We included *Cardamine hirsuta*<sup>31</sup> and *Eutrema*  
86 *salsugineum*<sup>32</sup> as outgroups. We considered three processes capable of producing incongruent  
87 histories: duplication and loss, incomplete lineage sorting (ILS), and IG. In addition, we assessed  
88 the possible contribution of phylogenetic error or ‘noise’.

89         Given the well-known history of whole genome duplication in Brassicaceae, we took  
90 extensive measures to minimize the possibility that duplication and loss biased our inferences.  
91 We identified single-copy nuclear genes as well as genes that were retained in all species post-  
92 duplication (see Discussion). In the chloroplast, we found 32 single-copy genes, while in  
93 mitochondria we identified eight. Maximum likelihood (ML) analyses of these yielded well-  
94 supported B(AC) trees (Fig. 1a and Fig. S2d-g). We identified 10,193 single-copy nuclear genes  
95 using *Orthofinder*<sup>35</sup> (denoted as ‘full single-copy dataset’) (Fig. S1a-c). These genes were  
96 indicated as single-copy by *Orthofinder* because they form clusters that include exactly one locus  
97 from each species (with the exception of *C. sativa*, see **Methods**). These single-copy genes span  
98 the eight chromosomes of *C. rubella* (Fig. S1d), whose karyotype serves as an estimate of the  
99 ancestral karyotype for these species<sup>36</sup>. ML analyses yielded 8,490 (87.6%) A(BC), 774 (8.0%)  
100 B(AC), and 429 (4.4%) C(AB) trees (Fig. 1c-f and Table S2).

101         The most parsimonious explanation for our single-copy genes is that they were either not  
102 duplicated in our focal species or, if duplicated, were returned to single-copy before a speciation  
103 occurred, thus behaving as unduplicated in a phylogenetic context, meaning that any observed

104 incongruent topologies resulted from a process other than duplication. However, while not  
105 parsimonious, it is important to consider the possibility that ancestral duplication, paralog  
106 retention through two speciation events, and lineage specific loss events led to hidden out-  
107 paralogs in our dataset. To further reduce the probability that this series of events contributed to  
108 incongruent gene trees, we further filtered our dataset to include only genes that were previously  
109 indicated as reliable single-copy markers in angiosperms<sup>33,34</sup>. This filter reduced our single-copy  
110 dataset to 2,098 genes (Fig. S1e-f). We combined this dataset with genes that were duplicated  
111 during whole genome duplication<sup>37</sup> but did not undergo loss in focal species to yield a dataset of  
112 2,747 genes, which we denote as ‘conservatively single-copy’, so named because they are the  
113 genes that are least likely to contain hidden out-paralogs. ML analyses of these genes yielded  
114 2,236 (86.5%) A(BC), 236 (9.1%) B(AC), and 114 (4.4%) C(AB) trees (Fig. 1b-f), consistent  
115 with our results from the full single-copy dataset.

116 To ask whether phylogenetic noise contributed to incongruent nuclear gene tree  
117 topologies, we also filtered our single-copy nuclear gene tree results to contain only trees in  
118 which the observed topology was supported by at least 70% bootstrap support (BS) and found  
119 that B(AC) and C(AB) trees were still present (Fig. 1f). Together, these analyses confirm the  
120 incongruent histories present in the organellar and nuclear genomes and indicate that  
121 incongruence cannot be fully explained by gene duplication and loss or by phylogenetic noise.

122

123 **Contribution of introgression to incongruent gene trees.** A number of approaches have been  
124 developed to determine the relative contributions of ILS and IG to gene tree incongruence.  
125 Comparative genomic approaches are based on the *D*-statistic<sup>5,9</sup>, which is typically applied to  
126 whole genome alignments and is calculated by determining the frequency of site patterns. It was

127 not feasible to construct accurate whole genome alignments among our taxa, and thus we used  
128 multiple sequence alignments from single-copy genes to calculate  $D$ - and  $F$ -statistics. Analyses  
129 of both full and conservatively single-copy gene alignments indicated that introgression occurred  
130 (Table S3; positive  $D$  and  $F$ ). Since phylogenomic analyses often focus on comparisons of gene  
131 trees rather than site-patterns, we also applied the rationale of the  $D$ -statistic to gene trees, using  
132 gene tree topologies as proxies for site patterns to calculate a related statistic, referred to here as  
133  $D_{GT}$  (see **Methods**). Consistent with  $D$  and  $F$ ,  $D_{GT}$  indicated that ILS is sufficient to explain the  
134 frequency of C(AB) but not the observed frequencies of A(BC) and B(AC) in the nuclear  
135 genome (Table S4; positive  $D_{GT}$ ).

136 Coalescent based approaches<sup>14,15</sup> use gene trees to distinguish between organismal  
137 histories that are tree-like (incongruencies among trees arise from ILS) and network-like  
138 (incongruencies result from ILS + IG). We analyzed our gene tree data in *PhyloNet*<sup>15</sup> and found  
139 that reticulate networks were favored over tree-like evolution (Fig. S2j-q;  $\Delta\text{AIC} \geq 87.80$  and  
140  $\Delta\text{BIC} \geq 73.50$ ). Similarly, *Tree Incongruence Checking in R (TICR)*<sup>14</sup> indicated that a simple  
141 tree-like history fit the data poorly because the concordance factors for a significant proportion  
142 of quartets departed from expectation (Fig. S2r-u;  $p = 0.00058$ ;  $\chi^2$  test). In sum, both  
143 comparative genomic and coalescent based approaches support an evolutionary history that  
144 includes IG.

145

146 **Recovery of the species branching order and introgression events.** To uncover which  
147 lineages were affected by IG, we determined the relative timing of the B(AC) and A(BC)  
148 branching events by calculating node depths (Fig. 2)<sup>38</sup>. IG nodes are expected to be younger than  
149 speciation nodes<sup>12,38,39</sup> because IG produces incongruent trees when it occurs between non-sister

150 species subsequent to speciation<sup>4,5,9</sup> (illustrated by Fig. 2a). Therefore, we calculated the depth of  
151 the node uniting clade A with clade C in nuclear B(AC) trees and compared it with the depth of  
152 the node uniting the B and C clades in nuclear A(BC) trees (Fig. 2a-c, N.D.). We calculated node  
153 depths using four separate measures to account for potential biases (Fig. 2d-g). To account for  
154 selection on amino acids, we used synonymous divergence ( $dS$ ) (Fig. 2d). To account for  
155 potential differing rates of evolution across the genome, we normalized  $dS$  using the divergence  
156 between the clade of interest and an outgroup (i.e. ‘relative node depth’)<sup>12</sup> (Fig. 2e). To account  
157 for potential differences in rates of evolution between lineages, we also calculated node depths  
158 from ultrametric trees in which the rates of evolution had been smoothed across the tree using a  
159 penalized likelihood approach<sup>40</sup> (Fig. 2f, Fig. S3, and Table. S5). To account for potential  
160 intragene discordance due to recombination within a gene, we divided each gene alignment into  
161 200nt windows, inferred a neighbor joining tree for each window, and only calculated node  
162 depth from windows that were concordant with the ML tree for the gene, thus minimizing the  
163 probability of recombination within the loci from which node depth is calculated (Fig. 2g, Fig  
164 S4). For all four node depth measures, the node depth for A(BC) was significantly shallower than  
165 for B(AC) (Fig. 2d-g, Fig. S3, Fig S4 and Table S6;  $p < 2.2e-16$ , Wilcoxon), indicating that IG  
166 rather than speciation produced the observed A(BC) nuclear gene trees. This result is insensitive  
167 to the removal of the deepest nodes in both A(BC) and B(AC) bins (Fig. S3o-t). Hence, node  
168 depth data suggest that A and C diverged from each other prior to the exchange of genes between  
169 clade B and C via IG. This surprising result stands in opposition to previously published trees  
170 inferred from single or concatenated nuclear genes, which strongly favor A(BC)<sup>20,22–24</sup>. However,  
171 it bolsters the argument that B(AC) best represents the species branching order despite the low  
172 frequency of these genes in the nucleus (similar to<sup>38</sup>), and further suggests that the vast majority



173 of nuclear genes in either B or C arrived there via IG. We discuss the implications of this finding  
174 on the concept of the species branching order (see **Discussion**). It should be noted that our  
175 downstream analyses of selection and neutral processes (Fig. 4, Fig. S6, and Table S6) are  
176 framed in the context of nuclear introgression but would remain equally valid if cytonuclear  
177 discordance arose via organellar introgression.

178

179 **Identification of unidirectional introgression donor and recipient lineages.** We next asked  
180 whether transfer of genetic material during IG was unidirectional and, if so, which of the two  
181 clade ancestors was the donor and which was the recipient of introgressed alleles. Existing  
182 methods for polarizing the direction of IG require additional taxa with specific phylogenetic  
183 positioning relative to the introgression event<sup>5,11</sup>. No such taxa are available for our inferred  
184 introgression event; therefore, existing polarization methods are not applicable to our data.  
185 Instead, we present a divergence-based approach to infer directionality of IG, calculated from  
186 pairwise sequence divergence between taxa involved in IG and a sister taxon by comparing  
187 divergence values obtained from introgressed loci *vs.* non-introgressed loci (see **Methods**).

188 We calculated the rate of pairwise  $dS$  for all pairs of species and used these to determine  
189 the average  $dS$  between pairs of clades (B *vs.* C =  $dS(B,C)$ ; A *vs.* C =  $dS(A,C)$ ; A *vs.* B =  
190  $dS(A,B)$ ) (Fig. S5). We denoted  $dS$  values with  $_{SP}$  when obtained from B(AC) trees (our inferred  
191 species branching order) and  $_{IG}$  when obtained from A(BC) trees (IG branching order) (Fig. 3a  
192 and b). We compared  $dS(B,C)_{IG}$ ,  $dS(A,C)_{IG}$ , and  $dS(A,B)_{IG}$  to  $dS(B,C)_{SP}$ ,  $dS(A,C)_{SP}$ , and  
193  $dS(A,B)_{SP}$ , respectively, to ask if divergence is consistent with unidirectional IG from B to C  
194 (Fig. 3a) or from C to B (Fig. 3b), or with bidirectional IG. We found that  $dS(B,C)_{SP} > dS(B,C)_{IG}$   
195 ( $p < 2.2e-16$ , Wilcoxon),  $dS(A,C)_{SP} < dS(A,C)_{IG}$  ( $p = 2.365e-12$ ), and  $dS(A,B)_{SP} = dS(A,B)_{IG}$

196 ( $p=0.1056$ ), indicating unidirectional IG from clade B to clade C (Fig. 3c and Fig. S5). This  
197 result is consistent with the *Phylonet* network shown in Fig. S2m and one shown in Fig. S2n,  
198 which respectively indicate that 96.6% and 90.5% of sampled nuclear alleles were introgressed  
199 from clade B to C.

200

201 **The role of cytonuclear interactions during introgression.** The IG that occurred during the  
202 evolution of clade C resulted in a genome in which the majority of nuclear alleles were displaced  
203 by alleles from clade B, while native organellar genomes were maintained. We asked whether we  
204 could detect patterns within the set of nuclear genes that were also maintained alongside  
205 organelles during IG. We hypothesized that during the period of exchange, selection would favor  
206 the retention of alleles that maintain cytonuclear interactions, especially when replacement with  
207 the paternal allele is deleterious<sup>7</sup>. Using Arabidopsis Gene Ontology (GO) data<sup>41</sup>, we asked if  
208 B(AC) nuclear genes were significantly enriched for chloroplast and mitochondrial-localized GO  
209 terms, indicating that these genes are more likely to be retained than are other nuclear genes. We  
210 calculated enrichment ( $E$ ) for each GO category by comparing the percentage of B(AC) nuclear  
211 genes with a given GO term to the percentage of A(BC) genes with that term (see **Methods**).  
212 Positive  $E$  indicates enrichment among B(AC) genes; negative  $E$  indicates enrichment among  
213 A(BC) genes. B(AC) nuclear genes are significantly enriched for chloroplast ( $E=0.10$ ,  
214  $p=0.00443$ , 1-tail Fisher's) and mitochondrial localized ( $E=0.13$ ,  $p=0.00250$ ) GO terms (Fig. 4a  
215 and Table S6). Enrichment was also detected at the level of organelle-localized processes such as  
216 photosynthesis ( $E=0.29$ ,  $p=0.01184$ ), including the light ( $E=0.44$ ,  $p=0.00533$ ) and dark ( $E=0.65$ ,  
217  $p=0.04469$ ) reactions. The opposite enrichment pattern exists for nuclear localized genes ( $E=-$

218 0.06,  $p=0.00936$ ) (Fig. 4a). In sum, these results suggest a role for selection in shaping which  
219 genes were displaced during IG.

220

221 **The role of nuclear-nuclear interactions during introgression.** We also asked if interactions  
222 between/among nuclear genes influenced the likelihood of replacement by foreign alleles. Using  
223 Arabidopsis protein-protein interaction data<sup>42</sup>, we constructed an interaction network of the full  
224 set of single-copy nuclear genes (Fig 4b). To assess whether genes with shared history are  
225 clustered in the network, we calculated its assortativity coefficient ( $A$ ) (**Methods**). We assessed  
226 significance by generating a null distribution for  $A$  using 10,000 networks of the same size and  
227 shape with randomized topology assignments. In our empirical network,  $A$  was significantly  
228 positive ( $A=0.0885$ ,  $p=0.00189$ , Z-test), and hence topologies are clustered (Fig. 4c), indicating  
229 that selection acted against genotypes containing interactions between maternal and paternal  
230 alleles.

231

232 **The role of physical linkage during introgression.** While it appears gene function exerted  
233 influence on nuclear IG, we also wondered whether blocks of genes with similar histories were  
234 physically clustered on chromosomes. We looked for evidence of haplotype blocks using the *C.*  
235 *rubella* genome map (Fig. 4d). Previous studies in this group estimate linkage disequilibrium to  
236 decay within 10kb<sup>43,44</sup>, creating blocks of paternal or maternal genes around that size. We  
237 assessed the physical clustering of genes with shared history by two measures: 1) number of  
238 instances in which genes with the same topology are located within 10kb of each other (Fig.  
239 S6a), and 2) number of instances in which neighboring genes share topology, regardless of  
240 distance (Fig. S6b). The second measure provides a simple measure of clustering without

241 requiring an estimate of ancestral linkage. We compared both measures to a null distribution  
242 generated from 10,000 replicated chromosome maps in which the topology assignments were  
243 randomized across the marker genes. By both measures, we found significant clustering of  
244 A(BC) (measure 1:  $p=3.022e-8$ ; measure 2:  $p=1.41364e-10$ , Z-test) and B(AC) (measure 1:  
245  $p=0.003645$ ; measure 2:  $p=1.7169e-11$ ) genes (Fig. S6c-h). The observed clustering indicates  
246 that haplotype blocks of co-transferred and un-transferred genes are detectable in extant  
247 genomes, pointing to physical linkage as a factor influencing whether genes are transferred or  
248 retained.

249

## 250 **Discussion:**

251 Phylogenomic studies in plants face unique challenges. The prevalence of gene and  
252 genome duplication complicates the detection of orthologs, and thus choosing markers that  
253 minimize duplication is extremely important when applying tests of IG originally developed for  
254 animals<sup>5</sup>. Since duplication history cannot be definitively known, we can never be sure that  
255 cryptic duplication has not introduced phylogenetic incongruence into our dataset; this is a risk in  
256 any phylogenetic study, especially in plants. We acknowledge that all nuclear genes have  
257 undergone duplication at some point in Brassicaceae<sup>37</sup> and address this challenge by specifically  
258 targeting genes least likely to have undergone duplication during the speciation and introgression  
259 events we detected. If duplication was biasing the results we obtained from our full single-copy  
260 dataset, we expected that the proportion of B(AC) trees would have decreased in our  
261 conservatively single-copy dataset. However, the proportions we observed were not substantially  
262 impacted by our conservative single-copy filter. In fact, the proportion of B(AC) genes was  
263 slightly higher in the conservatively single-copy genes, the opposite of what we would expect if

264 duplication was creating incongruent trees. Moreover, results of the  $D$ -,  $F$ -, and  $D_{GT}$ -statistics  
265 from both datasets significantly indicated IG (Table S3, and Table S4), another indication that  
266 biases associated with cryptic duplication and loss are not driving our conclusions of IG.

267 We applied several methods to distinguish between IG and ILS. Like all applications of  
268  $D$  and related statistics, it's important to acknowledge that ancestral population structure may  
269 produce signatures that mimic IG<sup>45</sup>. However, when this possibility was thoroughly explored in  
270 the case of Neanderthal, IG remained the favored hypothesis<sup>46</sup>. Here, regardless of the measure  
271 or approach employed, our results (Fig. S2, Table S3, and Table S4), were always consistent  
272 with an explanation of IG rather than ILS or duplication and loss. While we appreciate the  
273 limitations of each approach, here we argue that the consistent finding of IG favors this  
274 hypothesis over all others.

275 Our initial interpretation of the observed phylogenetic incongruence was that A(BC)  
276 resulted from simple speciation events and B(AC) resulted from IG between clades A and C, a  
277 pattern we referred to as cytoplasmic IG. However, in light of recent findings from  
278 mosquitos<sup>38,47</sup>, we thought it important to consider alternative hypotheses. Using the same  
279 approach that revealed IG in mosquitos, we calculated the mean node depth for each of the  
280 alternative topologies we recovered for nuclear genes. In addition, we employed several  
281 strategies to account for the effects of selection (Fig. 2d), effective population size variation  
282 across the genome (Fig. 2e), lineage-specific effects (Fig. 2f). and intragenic recombination (Fig.  
283 2g) on our node depth calculations. In all cases, our node depth comparisons rejected the  
284 hypothesis that the node uniting clades A and C on B(AC) trees resulted from an introgression  
285 event, and instead indicated that the node uniting clades B and C on A(BC) trees resulted from

286 an introgression between clades B and C. Based on these results, we suggest that the ‘true’  
287 species branching order is B(AC).

288         There is growing debate about the efficacy of bifurcating phylogenies in describing  
289 organismal evolution, prompting the development of powerful network frameworks that  
290 highlight reticulation in species relationships. While our analysis reinforces the importance of  
291 considering reticulation, we also show that bifurcating trees should not be entirely abandoned in  
292 the face of reticulation. The presence of reticulation does not preclude the occurrence of simple  
293 bifurcating speciation events, it simply means some bifurcations result from speciation while  
294 others result from IG. Therefore, some gene trees will have nodes representing speciation events  
295 while other genes trees will have a node or nodes that represent IG. We define the ‘true’ species  
296 branching order as the topology of the gene tree in which all nodes represent speciation events,  
297 even if this history does not represent the majority of the genome. Our finding of massive  
298 nuclear IG leads to a dilemma regarding which branching order should be used in future  
299 comparative studies in this group. For many (if not most) practical purposes, it is reasonable to  
300 continue to use A(BC) because it represents the history of most of the genome. However, studies  
301 using this topology should bear in mind that this history is more complicated than simple  
302 speciation and consider the potential implications. Integrating all available information into a  
303 useful model for studying trait evolution represents a future goal in systematics.

304         We demonstrate the use of several complementary techniques to identify the taxa that  
305 exchanged genes during IG, many of which operate in a four-taxon (or four-clade) context.  
306 However, most methods do not explicitly distinguish which taxon served as donor and which as  
307 recipient during IG. The existing methods that do polarize IG are only able to do so when there is  
308 a fifth taxon (or clade)<sup>11</sup>. The divergence-based approach presented here can be applied to infer

309 the directionality of IG in a four-taxon case when additional taxa are not available. It should be  
310 noted that our goal in the present study was to present the conceptual framework of divergence-  
311 based polarization of IG and to lay the groundwork for further development of these types of  
312 methods. It was not our goal, here, to mathematically derive the test or to explore parameter  
313 robustness. For example, factors such as population size and structure, divergence time, size of  
314 loci, rate of evolution<sup>48</sup>, and extent of linkage disequilibrium<sup>49</sup> have been demonstrated to affect  
315 existing statistics for inferring IG<sup>9,45</sup> but have not been explored here. We have also not explored  
316 the power of our test to polarize IG when it is asymmetrical but not strictly unidirectional, all of  
317 the above representing important next steps toward understanding the conditions under which  
318 divergence-based phylogenetic methods can accurately recover the direction of IG.

319         Applied to genomic data, our test infers IG of nuclear genes from clade B to clade C.  
320 Since cytoplasmic inheritance is matrilineal in Brassicaceae, we conclude that clade C was the  
321 maternal recipient of paternal clade B nuclear alleles. While we can only postulate about the  
322 specific crosses and backcrosses that occurred during IG, it is likely that F1 hybrids arose from a  
323 clade C maternal parent and clade B paternal parent. We find evidence that selection acted  
324 during the backcrosses that followed, resulting in resistance of organelle interacting nuclear  
325 genes to replacement by paternal alleles. Maternal nuclear alleles that function in chloroplasts or  
326 mitochondria in fundamental processes were not replaced at the same rate as maternal alleles  
327 localized to other areas of the cell or for other functions. These genes may constitute a core set  
328 whose replacement by paternal alleles is deleterious. We also find evidence that selection acted  
329 to maintain nuclear-nuclear interactions. In general, our results suggest that epistatic interactions  
330 between genes exerted selective pressure that influenced which genes were displaced and which

331 were retained. Whether this type of selection drove the displacement or retention of entire  
332 haplotype blocks via hitchhiking remains a future question.

333 In summary, our comparative genomic analyses are consistent with an evolutionary  
334 history in which massive unidirectional nuclear IG, driven by selection and influenced by  
335 linkage, underlie the original observation of “chloroplast capture.” The species branching order  
336 in this group is more accurately reflected by B(AC), and thus similar to the findings of <sup>38</sup>, nuclear  
337 IG obscured speciation such that the latter was only recoverable from extensive genomic data.  
338 What makes IG here particularly interesting is that its impact on the genome is evident despite  
339 the fact that it must have occurred prior to the radiation of clade A 13 – 9 million years ago<sup>20,22</sup>.  
340 Hence, it’s likely that, as additional high-quality genomes become available, comparative  
341 analyses will reveal histories that include nuclear IG, even when the genomes considered are  
342 more distantly related. In short, our findings explore the genomic battle underlying chloroplast  
343 capture to reveal an onslaught of alleles via unidirectional IG. A core set of nuclear genes  
344 resisted displacement by exogenous alleles; purifying selection removed genotypes with  
345 chimeric epistatic combinations that were deleterious, just as Bateson-Dobzhansky-Muller first  
346 described<sup>7,50</sup>. Will other IG events reveal similar selective constraints as those we detail? If so, it  
347 could point us toward key interactions between cytoplasmic and nuclear genomes that lead to  
348 successful IG, thereby refining our understanding of the factors governing the movement of  
349 genes among species.

350



351 **Methods:**

352 **Phylogenomic pipeline**

353 **Clustering of putative orthologs.** Coding sequences (CDS) for *Arabidopsis thaliana*, *A. lyrata*,  
354 *Capsella rubella*, *C. grandiflora*, *Boechera stricta*, and *Eutrema salsugineum* were obtained  
355 from *Phytozome*<sup>16,25–27,32,51</sup>; *Camelina sativa* and *Cardamine hirsuta* were obtained from *NCBI*  
356 <sup>28,31</sup>. Datasets were processed to contain only the longest gene model when multiple isoforms  
357 were annotated per locus. CDS were translated into amino acid (AA) sequences using the  
358 standard codon table. The resulting whole proteome AA sequences for the eight species were  
359 used as input to cluster orthologs via *Orthofinder* (version 1.1.4)<sup>35</sup> under default parameters (Fig.  
360 S1a). Two different filtering strategies with varying stringency were applied to the resulting  
361 clusters to yield two dataset partitions referred to as ‘full single-copy dataset’ and  
362 ‘conservatively single-copy dataset’. Both filtering strategies are described below.

363

364 **Full single-copy dataset filtering.** The full single-copy dataset was identified by sorting  
365 *Orthofinder* results to include only clusters that contained exactly one sequence per species,  
366 except in the case of *C. sativa*. Clusters containing one to three sequences from *C. sativa* were  
367 also retained as single-copy (Fig. S1b) because it is a hexaploid of relatively recent origin. Thus,  
368 clusters with up to three *C. sativa* paralogs (*i.e.* homeologs) were retained, and we expected these  
369 homeologs to form a clade under phylogenetic analysis (see **Multiple sequence alignment and**  
370 **gene tree inference of nuclear genes**). Gene clusters that yielded trees deviating from this  
371 expectation were omitted from further analysis. The full single-copy dataset also contains groups  
372 classified as retained duplicates (Fig. S1c). Retained duplicate clusters contain exactly two  
373 sequences per species (three to six in *C. sativa*). The *A. thaliana* sequences in each cluster

374 represent known homeologs from the  $\alpha$  whole genome duplication that occurred at the base of  
375 Brassicaceae<sup>37</sup>, and thus is shared by all sampled species in this study. We retained only those  
376 gene clusters that produced trees in which the paralogs formed reciprocally monophyletic clades  
377 (Fig. S1c).

378

379 **Conservative single-copy dataset filtering.** We also used a more stringent set of criteria to  
380 develop a conservatively single-copy dataset. For this dataset, we compared the results obtained  
381 from *Orthofinder* with results from previously published assessments of plant single-copy or low  
382 copy gene families<sup>33,34</sup>. The criteria and taxon sampling of our *Orthofinder* filtering and the  
383 filtering strategies of the two previous analyses differed, meaning each analysis provides its own  
384 level of stringency. Moreover, both previous analyses included *A. thaliana*, allowing for direct  
385 comparison with our results. We filtered our clusters to include only those genes recovered by  
386 both *Orthofinder* and in at least one published analysis. We refer to these as conservatively  
387 single-copy. Conservatively single-copy genes plus the retained duplicates described above  
388 constitute the conservatively single-copy dataset. CP and MT gene datasets were filtered using  
389 the same criteria used to filter the full single-copy dataset.

390

391 **Multiple sequence alignment and gene tree inference of nuclear genes.** For single-copy  
392 genes, we generated AA-guided multiple sequence alignment of CDS using the *MAFFT*  
393 algorithm (version 6.850)<sup>52</sup>, implemented using *ParaAT* (version 1.0)<sup>53</sup>, under the default  
394 settings for both. Multiple sequence alignments of CDS for each gene cluster were used to infer  
395 maximum likelihood gene trees using *RAxML* (version 8)<sup>54</sup> under the general time reversible

396 model with gamma distributed rate heterogeneity. Support values for nodes were calculated from  
397 100 bootstrap replicates using rapid bootstrapping.

398

399 **Assembly and annotation of mitochondria and chloroplast genomes.** Whole genome  
400 sequence reads for *A. lyrata*, *B. stricta*, *C. rubella*, *C. grandiflora*, and *C. sativa* were acquired  
401 from *NCBI's Sequence Read Archive* (SRA). The run IDs of SRA files used to assemble  
402 organelle genomes for each species were: *A. lyrata* (DRR013373, DRR013372); *B. stricta*  
403 (SRR3926938, SRR3926939); *C. rubella* (SRR065739, SRR065740); *C. grandiflora*  
404 (ERR1769954, ERR1769955); *C. sativa* (SRR1171872, SRR1171873). Both SRAs for each  
405 species were independently aligned to the *Arabidopsis thaliana* mitochondrial (MT) genome  
406 (Ensembl 19) using *HiSat2*<sup>55</sup> with default settings for paired-end reads within *CyVerse's*  
407 *Discovery Environment*<sup>56</sup>. 15-30X coverage was recovered for each alignment. Mapped read  
408 alignment files were converted from BAM to SAM using *SAMtools*<sup>57</sup>. MT consensus sequences  
409 were generated (base pair call agreement with 75% of all reads) from each alignment within  
410 *Geneious* (version 7.0; Biomatters)<sup>58</sup>. Each MT consensus sequence was annotated based on the  
411 *A. thaliana* MT genome annotation (Ensembl 19). CDSs were then extracted using *gffread* from  
412 the *Cufflinks* package<sup>59</sup>. The same method was used to assemble the *B. stricta* CP genome. All  
413 other chloroplast genome sequences were publicly available.

414

415 **Multiple sequence alignment and tree inference from chloroplast and mitochondria**  
416 **markers.** Single-copy CP and MT genes were identified, aligned, and used to infer phylogeny as  
417 described previously for nuclear genes. Individual gene tree results are presented in Fig. S2d-e.  
418 We also generated concatenated alignments for both the CP and MT genes using

419 *SequenceMatrix*<sup>60</sup>. We inferred trees (Fig. 1a-b) from both concatenated alignments using  
420 *RAxML* with the same parameters described above.

421

## 422 **Downstream analyses**

423 **Gene tree topology analysis.** Tree sorting was performed in batch using the *R* packages, *Ape*<sup>61</sup>,  
424 *Phangorn*<sup>62</sup>, and *Phytools*<sup>63</sup>. Gene trees from the retained duplicates were midpoint rooted and  
425 split at the root into two subtrees, each of which contained a sequence from all eight analyzed  
426 species. Subtrees were analyzed as individual trees alongside all other single-copy gene families  
427 as described below. First, each gene tree was rooted at *E. salsugineum*. Next trees were sorted by  
428 considering the topological arrangement of the A, B, and C lineages. For example, a tree was  
429 categorized A(BC) if *B. stricta*, *C. rubella*, *C. grandiflora*, and *C. sativa* formed a monophyletic  
430 clade. Thus, the branch in the tree leading to the monophyletic clade (the branch uniting *B.*  
431 *stricta*, *C. rubella*, *C. grandiflora*, and *C. sativa* in the above example) was considered the  
432 topology-defining branch. Statistical support for any given tree was summarized as the bootstrap  
433 value along the topology-defining branch.

434         Since the focus of our analysis was on topological incongruence of A, B, and C clades,  
435 our topology assessment was not designed to detect topological arrangements within A, B, and C  
436 clades or in other parts of the trees. If a gene cluster failed to form either a monophyletic A or C  
437 clade following phylogenetic analysis, it was marked as ‘other topology’ and removed from  
438 further downstream analysis. Exact topologies of all trees, including those recorded as ‘other  
439 topology’, are summarized in Table S2.

440

441

442 **Applying  $D$ ,  $F$ , and  $D_{GT}$  statistics to assess the effects of incomplete lineage sorting and**  
443 **introgression.** To determine whether the observed gene tree incongruences could have been  
444 caused primarily by incomplete lineage sorting (ILS), we calculated Patterson's  $D$ -statistic ( $D$ )  
445 (also known as the ABBA-BABA or 4-taxon test)<sup>5,9</sup>.  $D$  is typically applied to whole genome  
446 alignments of three in-group taxa and one out-group taxon. It is calculated by scanning the  
447 alignment to identify site patterns consistent with two possible resolutions of ILS (ABBA and  
448 BABA). Due to the relatively deep divergence and numerous chromosomal rearrangements  
449 between genomes used here, it was not feasible to construct accurate whole genome alignments.  
450 Instead, we identified ABBA and BABA site patterns within single-gene multiple sequence  
451 alignments used to infer gene trees. We calculated  $D$  and  $F$  using the total number ABBA and  
452 BABA sites from all nuclear gene alignments (or subsets of nuclear genes corresponding to  
453 individual chromosomes or conservatively single-copy genes). We excluded *C. sativa* sequences  
454 from this analysis due to the presence of multiple *C. sativa* paralogs in some trees. We  
455 considered only biallelic sites in which the two outgroups, *E. salsugineum* and *C. hirsuta*, have  
456 the same allele. We also required individual species within each clade to have the same allele.  
457 For example, an ABBA site would be one in which *E. salsugineum*, *C. hirsuta*, *A. thaliana*, *A.*  
458 *lyrata*, *C. rubella*, *C. grandiflora*, and *B. stricta* display T, T, G, G, G, G, and T, respectively.  
459 Note that all members of clade A and C share the derived allele. An example of a BABA site  
460 would be T, T, G, G, T, T, and G, respectively. In this case, members of clades A and B share the  
461 derived allele. We also tallied AABB sites, (e.g. T, T, T, T, G, G, and G, respectively), in which  
462 clades B and C share the derived allele, although AABB sites are not a component of  $D$  or  $F$ .  
463 We calculated  $D$  and  $F$  according to the equations from<sup>64</sup>. All site counts and statistics are shown  
464 in Table S3.

465 We also applied the rationale of  $D$  to gene tree topology counts by calculated a related  
466 statistic,  $D_{GT}$ . We used gene tree topologies as proxies for site patterns. Since B(AC) and C(AB)  
467 trees were closest in frequency in the nuclear genome, we asked whether their frequencies were  
468 statistically significantly different using  $D_{GT}$ . B(AC) trees and C(AB) trees were treated as  
469 ABBA and BABA sites, respectively, while A(BC) was treated as AABB.  $D_{GT}$  was then  
470 calculated as follows:

$$D_{GT} = (\sum(\text{B(AC) trees}) - \sum(\text{C(AB) trees})) / (\sum(\text{B(AC) trees}) + \sum(\text{C(AB) trees}))$$

475 We calculated  $D_{GT}$  for the set of all nuclear genes as well as for subsets of genes present  
476 on each of *C. rubella*'s nuclear chromosomes<sup>36</sup>. Results from all  $D_{GT}$  calculations are given in  
477 Table S4.

478  
479 **Phylogenetic network reconstruction and introgression analysis.** To evaluate the likelihood  
480 that the observed incongruence was caused by IG, we also reconstructed maximum likelihood  
481 phylogenetic networks using InferNetwork\_ML in *PhyloNet* (version 3.6.1)<sup>15</sup>. We input all  
482 nuclear gene trees (Fig. S1d, *Full single-copy genes* dataset) and implemented InferNetwork\_ML  
483 using the command 'InferNetwork\_ML (all)  $h$  -n 100 -di -o -pl 8;', where  $h$  is  
484 the number of reticulations allowed in a given network. The method ignores gene tree branch  
485 lengths, utilizing gene tree topologies alone to infer reticulation events. We performed separate  
486 analyses using  $h = 0$  (a tree),  $h = 1$ , and  $h = 2$ , outputting the 100 most likely trees/networks  
487 (designated with -n) from each analysis. We followed the analysis strategies of<sup>65</sup>, manually  
488 inspecting networks to identify those with edges consistent with both the major nuclear topology

489 [A(B,C)] as well as the major CP and MT topology [B(A,C)] (Fig. S2l-o). Additionally, we  
490 reported the most likely tree/network from each analysis (Fig. S2k, p-q). As an additional means  
491 of asking whether ILS alone adequately explains incongruence, we performed Tree Incongruence  
492 Checking in R (TICR)<sup>14</sup>. We used a population tree inferred from *PhyloNet* ( $h = 0$ ) (Fig. S2j)  
493 with a table of concordance factors for all quartets. We performed the *TICR* test as implemented  
494 in the *R* package, *phylolm*<sup>66</sup>, according to the methods outlined in:  
495 <https://github.com/crs14/PhyloNetworks.jl/wiki/TICR-test:-tree-versus-network%3F>.

496  
497 **Identification of introgressed topology and species branching order.** In order to identify the  
498 topology most likely to represent IG, we measured node depths on trees displaying the A(BC)  
499 B(AC). As above, *C. sativa* sequences were not considered in order to avoid complications  
500 associated with paralogous sequences. For each nuclear gene tree, we calculated pairwise  
501 synonymous divergence ( $dS$ ) between taxa on the tree using *PAML* (version 4.8)<sup>67</sup>. To infer the  
502 pairwise distance between two clades on the tree, we took the average  $dS$  score between each  
503 combination of taxa present in the two clades. For example, the depth of the node uniting clades  
504 A and C on B(AC) trees would be the average of  $dS(A. thaliana, C. rubella)$ ,  $dS(A. lyrata, C.$   
505  $rubella)$ ,  $dS(A. thaliana, C. grandiflora)$ , and  $dS(A. lyrata, C. grandiflora)$ . To calculate  
506 normalized  $dS$ , each  $dS$  node depth (as described above) was divided by the average pairwise  $dS$   
507 of each ingroup species versus the outgroup, *C. hirsuta*.

508 We also calculated node depths from ultrametric gene trees. Before measuring node  
509 depths, gene trees were smoothed to ultrametric trees using semiparametric penalized likelihood  
510 rate smoothing<sup>40</sup>. We implemented the rate smoothing algorithm designated by the *chronopl*  
511 function in the *Ape* package. We tested six values of the smoothing parameter ( $\lambda$ ), which

512 controls the tradeoff between parametric and non-parametric formulation of rate smoothing, to  
513 assess the sensitivity of node depths to different values of  $\lambda$ . We calculated node-depth on  
514 ultrametric trees for nodes representing  $T_1$  and  $T_2$  on each given topology (Fig. S3a). We plotted  
515 the frequency distributions of node depths (Fig. S3b) as well as descriptive statistics (Fig. S3c-t).

516 In order to account for intragenic recombination, we split each gene alignment into 200nt  
517 alignments, the goal being to reduce the probability of recombination occurring in the middle of  
518 our alignment. For each window, we calculated a distance matrix and inferred a neighbor joining  
519 “window tree” using *Ape* in *R*<sup>61</sup>. We calculated the depth of the  $T_1$  node for each window  
520 displaying either A(BC) or B(AC) from the distance matrix by averaging the pairwise distance  
521 values similar to our treatment of  $dS$  node depths above. We documented the number of  
522 discordant windows in alignments for A(BC) (Fig. S4a) and B(AC) (Fig. S4b) trees and used  
523 boxplots to compare distributions of A(BC) and B(AC) node depths (Fig. 2g and Fig. S4c).

524  
525 **Divergence-based polarization of introgression.** For each nuclear gene tree from our  
526 Brassicaceae dataset, we calculated pairwise synonymous divergence ( $dS$ ) between taxa on the  
527 tree using *PAML* (version 4.8)<sup>67</sup>. To infer the pairwise distance between two clades on the tree,  
528 we took the average  $dS$  score between each combination of taxa present in the two clades. We  
529 excluded *C. sativa* sequences from this analysis due to the presence of multiple *C. sativa*  
530 paralogs in some trees. We define  $dS$  between clades B and C, clades A and C, and clades A and  
531 B as  $dS(B,C)$ ,  $dS(A,C)$ , and  $dS(A,B)$ , respectively (Fig. 3 and Fig. S5). For example, to calculate  
532 the distance between clade A and clade C ( $dS(A,C)$ ) for a given tree, we used the following  
533 equation:

534



$$dS(A, C) = (dS(A.thaliana, C. rubella) + dS(A.thaliana, C. grandiflora) + dS(A.lyrata, C. rubella) + dS(A.lyrata, C. grandiflora)) / 4$$

We calculated  $dS(X, Y)$  for both the species branching order, B(AC), and the introgression tree, A(BC) ( $dS(X, Y)_{SP}$  vs.  $dS(X, Y)_{IG}$ , respectively). Frequency distributions of each value were determined.

**GO category enrichment analysis.** *Gene Ontology* (GO)<sup>41</sup> data for Arabidopsis were obtained from *The Arabidopsis Information Resource* ([www.arabidopsis.org](http://www.arabidopsis.org))<sup>16</sup>. We determined the GO terms associated with the Arabidopsis genes present in our full single-copy data set. For each GO term, the percentage of B(AC) trees containing the GO term was compared to the percentage of A(BC) trees containing it. Comparisons were quantified with an enrichment score ( $E$ ). For example, we used the following equation to ask if B(AC) or A(BC) topology genes are enriched for CP localization:

$$E = ((\% \text{ B(AC) trees that are CP localized}) - (\% \text{ A(BC) trees that are CP localized})) / (\% \text{ B(AC) + A(BC) topology genes that are CP localized})$$

Positive  $E$  indicates enrichment for a given GO category among B(AC) trees, while negative  $E$  indicates enrichment among A(BC) trees (Table S6).

**Network analysis of protein-protein interactions.** Experimentally curated protein-protein interaction data for Arabidopsis were downloaded from *Arabidopsis thaliana Protein Interaction Network (AtPIN)* (version 2.6.70)<sup>42</sup>. Interaction data were filtered to contain only genes included in the full single-copy data set. An undirected interaction network was visualized and analyzed

561 using the *igraph* package (<http://igraph.org>) in *R*. Each node in the graph represents a single-  
562 copy nuclear gene family while each edge in the graph indicates a physical interaction in  
563 *Arabidopsis*. Nodes were colored by gene tree topology and diameter of nodes are proportional  
564 to bootstrap support values for the gene tree (see Fig. S2a-c).

565 We asked if genes displaying the same topology are clustered with each other in the  
566 network by calculating nominal assortativity<sup>68</sup>. Assortative mixing/clustering of gene tree  
567 topology results across the network was quantified by the assortativity coefficient ( $A$ ) of the  
568 network. Positive  $A$  indicates clustering of genes with the same topology, while negative  $A$   
569 indicates over-dispersal. We calculated the observed  $A$  for our network as well as a null  
570 distribution of  $A$  generated by randomly assigning a topology to nodes in 10,000 replicates of our  
571 network.

572  
573 **Mapping of gene coordinates to *A. thaliana* and *C. rubella* nuclear genomes.** Topology  
574 results were mapped to the nuclear genome of *C. rubella* using the gene coordinates from the  
575 GFF file associated with the genome assembly. Genome maps were visualized using the *R*  
576 package, *Sushi*<sup>69</sup>, made available through *Bioconductor*<sup>70</sup>. Colored horizontal lines indicate genes  
577 displaying each topology. The length of each line represents the bootstrap support value found at  
578 the topology-defining branch in the gene tree (see Fig. S2a-c).

579  
580 **Detection of linkage disequilibrium.** Topology results mapped to the *C. rubella* genome were  
581 used to ask if genes displaying the same topology are clustered together linearly along  
582 chromosomes. We assessed the physical clustering of A(BC), B(AC), and C(AB) genes with two  
583 measures: 1) number of instances in which genes with the same topology are located within 10kb

584 of each other (Fig. S6a), and 2) number of instances in which neighboring genes share topology,  
585 regardless of distance (Fig. S6b). We established a null distribution for both measurements by  
586 generating 10,000 maps of the *C. rubella* genome in which observed location of single-copy  
587 genes and the overall gene tree frequencies were maintained, but the assignment of topologies to  
588 genes was randomized across chromosomes. Measure 1 and measure 2 were calculated for each  
589 of the 10,000 replicates to obtain null distributions.

590

## 591 **Statistical Analyses**

592 All statistical tests were performed in *R* (version 3.4). Below, we describe methods used  
593 to assess the significance of our results. Our general strategy was to provide sufficient  
594 information to enable readers to make their own interpretations of the data; toward that goal, we  
595 have included Bonferroni corrected and uncorrected (raw) *p*-values for each experiment where  
596 corrections could be applied (Tables S5 and Table S5 or within supplemental text). The  
597 conclusions we draw are statistically robust, and thus are not affected by whether significance is  
598 assessed by raw or Bonferroni corrected *p*-values. The fact that the majority of the *p*-values in  
599 support of our conclusions are significant shows that we are not ‘cherry picking’. Thus, our  
600 results are unlikely to have been affected by type-one error that can be associated with multiple  
601 tests. Therefore, in order to avoid inflation of type-two error, we report raw *p*-values in the main  
602 body of the manuscript.

603

604 ***D*, *F*, and *D<sub>GT</sub>*-statistics.** We calculated *D*, *F*, and *D<sub>GT</sub>* for both the full single-copy and  
605 conservatively single-copy data sets. Confidence intervals were obtained by resampling either  
606 dataset to generate 10,000 bootstrap replicates, recalculating *D/F/D<sub>GT</sub>* for each replicate. The

607 resulting distributions were compared using the Z-test. To account for potential autocorrelation  
608 bias caused by non-independence of linked genes,  $D/F/D_{GT}$  were also calculated using block  
609 bootstrapping. For  $D$  and  $F$ , block bootstrapping was achieved by simply bootstrap resampling  
610 from the available gene alignments and recalculating  $D/F$  with each replicate. For  $D_{GT}$  block  
611 bootstrapping was accomplished by splitting the dataset into 100 equal size blocks of  
612 neighboring genes based on position along *C. rubella* chromosomes. Blocks were then bootstrap  
613 resampled 10,000 times and  $D_{GT}$  was recalculated with each replicate to obtain a distribution.  $P$ -  
614 values from analyses of the whole genome were Bonferroni adjusted for four comparisons for  
615  $D_{GT}$ .

616

617 **Phylogenetic network reconstruction and introgression analysis.** *PhyloNet* models were  
618 statistically compared by calculating AIC and BIC scores for each tree/network with the following  
619 expressions:

620

$$621 \quad \text{AIC} = 2k - 2(\log L)$$

622

$$623 \quad \text{BIC} = (\log(n) * k) - 2(\log L)$$

624

625 where  $k$  is the number of free parameters in the model,  $n$  is the number of input gene trees, and  $L$   
626 is the maximum likelihood value of the model. We compared hypotheses by calculated  
627 difference in AIC and BIC scores for each given tree/network relative to the most likely network  
628 ( $\Delta\text{AIC}$  and  $\Delta\text{BIC}$ ).

629

630 **Node depth based test of species branching order.** Frequency distributions of node depths  
631 were plotted. Two-tailed  $T$ -tests and Wilcoxon rank sum tests were performed to assess

632 differences in distribution means and medians, respectively. *P*-values were Bonferroni corrected  
633 for six comparisons.

634

635 **Divergence based test of IG directionality.** Frequency distributions of node depths were  
636 plotted. Two-tailed Wilcoxon rank sum tests were performed to assess differences in distribution  
637 medians. *P*-values were Bonferroni corrected for three comparisons.

638

639 **GO category enrichment.** Enrichment of GO categories was assessed by comparing GO  
640 categories of A(BC) genes versus B(AC) genes. For each GO category, two-by-two contingency  
641 tables were constructed and used to perform Fisher's exact tests. Results from two-tailed and  
642 one-tailed tests are reported. *P*-values from primary comparisons were Bonferroni corrected for  
643 three comparisons.

644

645 **Protein-protein interaction network.** Clustering in the interaction network was quantified with  
646 an assortativity coefficient ( $A$ )<sup>68</sup>. To assess significance of the observed  $A$ , we randomly assigned  
647 one of the three topologies (keeping the frequency of each topology the same as in the original  
648 data set) to genes in 10,000 copies of the network. We computed  $A$  for each of the 10,000  
649 networks to obtain a null distribution of  $A$  and used the null distribution to perform a two-tailed  
650 *Z*-test.

651

652 **Haplotype block linear clustering.** We quantified linear clustering of topologies by counting  
653 the number of occurrences of proximal and neighboring genes in the observed data. We assessed  
654 the significance of the observed values by generating null distributions from 10,000 datasets in

655 which the topologies were randomized. We used the null distributions to perform two-tailed Z-  
656 tests. *P*-values were Bonferroni corrected for six comparisons.

657 **Data Availability:**

658 Gene tree data are linked to the online version of the paper. Scripts and input files used to  
659 perform analyses are available at:

660 [https://github.com/EvanForsythe/Brassicaceae\\_phylogenomics](https://github.com/EvanForsythe/Brassicaceae_phylogenomics).

661

662

663 **References:**

- 664 1. Stebbins, G. L. The Significance of Hybridization for Plant Taxonomy and Evolution.  
665 *Taxon* **18**, 26–35 (1968).
- 666 2. Yakimowski, S. B. & Rieseberg, L. H. The role of homoploid hybridization in evolution:  
667 A century of studies synthesizing genetics and ecology. *Am. J. Bot.* **101**, 1247–1258  
668 (2014).
- 669 3. Rieseberg, L. H., Whitton, J. & Linder, C. R. Molecular marker incongruence in plant  
670 hybrid zones and phylogenetic trees. *Acta Bot. Neerl.* **45**, 243–262 (1996).
- 671 4. Dasmahapatra, K. K. *et al.* Butterfly genome reveals promiscuous exchange of mimicry  
672 adaptations among species. *Nature* **487**, 94–98 (2012).
- 673 5. Green, R. E. *et al.* A Draft Sequence of the Neandertal Genome. *Science (80-. )*. **328**, 710–  
674 722 (2010).
- 675 6. Rieseberg, L. H. & Soltis, D. E. Phylogenetic consequences of cytoplasmic gene flow in  
676 plants. *Evol. trends Plants* **5**, 65–84 (1991).
- 677 7. Sloan, D. B., Havird, J. C. & Sharbrough, J. The on-again, off-again relationship between  
678 mitochondrial genomes and species boundaries. *Mol. Ecol.* **26**, 2212–2236 (2017).
- 679 8. Joly, S., McLenachan, P. A. & Lockhart, P. J. A Statistical Approach for Distinguishing  
680 Hybridization and Incomplete Lineage Sorting. *Am. Nat.* **174**, E54–E70 (2009).
- 681 9. Durand, E. Y., Patterson, N., Reich, D. & Slatkin, M. Testing for Ancient Admixture  
682 between Closely Related Populations. *Mol. Biol. Evol.* **28**, 2239–2252 (2011).
- 683 10. Stolzer, M. *et al.* Inferring duplications, losses, transfers and incomplete lineage sorting  
684 with nonbinary species trees. *Bioinformatics* **28**, i409–i415 (2012).
- 685 11. Pease, J. B. & Hahn, M. W. Detection and Polarization of Introgression in a Five-Taxon  
686 Phylogeny. *Syst. Biol.* **64**, 651–662 (2015).
- 687 12. Rosenzweig, B. K., Pease, J. B., Besansky, N. J. & Hahn, M. W. Powerful methods for  
688 detecting introgressed regions from population genomic data. *Mol. Ecol.* 2387–2397  
689 (2016). doi:10.1111/mec.13610
- 690 13. Than, C., Ruths, D. & Nakhleh, L. PhyloNet: a software package for analyzing and  
691 reconstructing reticulate evolutionary relationships. *BMC Bioinformatics* **9**, 322 (2008).
- 692 14. Stenz, N. W. M., Larget, B., Baum, D. A. & Ané, C. Exploring tree-like and non-tree-like  
693 patterns using genome sequences: An example using the inbreeding plant species  
694 *Arabidopsis thaliana* (L.) heynh. *Syst. Biol.* **64**, 809–823 (2015).
- 695 15. Than, C., Ruths, D. & Nakhleh, L. PhyloNet: a software package for analyzing and  
696 reconstructing reticulate evolutionary relationships. *BMC Bioinformatics* **9**, 322 (2008).
- 697 16. Lamesch, P. *et al.* The Arabidopsis Information Resource (TAIR): Improved gene  
698 annotation and new tools. *Nucleic Acids Res.* **40**, 1202–1210 (2012).
- 699 17. Bailey, C. D. *et al.* Toward a global phylogeny of the Brassicaceae. *Mol. Biol. Evol.* **23**,  
700 2142–2160 (2006).
- 701 18. Beilstein, M. A., Al-Shehbaz, I. A. & Kellogg, E. A. Brassicaceae phylogeny and  
702 trichome evolution. *Am. J. Bot.* **93**, 607–619 (2006).
- 703 19. Beilstein, M. A., Al-Shehbaz, I. A., Mathews, S. & Kellogg, E. A. Brassicaceae  
704 phylogeny inferred from phytochrome A and *ndhF* sequence data: tribes and trichomes  
705 revisited. *Am. J. Bot.* **95**, 1307–27 (2008).
- 706 20. Beilstein, M. A., Nagalingum, N. S., Clements, M. D., Manchester, S. R. & Mathews, S.  
707 Dated molecular phylogenies indicate a Miocene origin for *Arabidopsis thaliana*. *Proc*  
708 *Natl Acad Sci U S A* **107**, 18724–18728 (2010).

- 709 21. Couvreur, T. L. P. *et al.* Molecular phylogenetics, temporal diversification, and principles  
710 of evolution in the mustard family (Brassicaceae). *Mol. Biol. Evol.* **27**, 55–71 (2010).
- 711 22. Huang, C.-H. *et al.* Resolution of Brassicaceae Phylogeny Using Nuclear Genes Uncovers  
712 Nested Radiations and Supports Convergent Morphological Evolution. *Mol. Biol. Evol.*  
713 **33**, msv226- (2015).
- 714 23. Oyama, R. K. *et al.* The shrunken genome of *Arabidopsis thaliana*. *Plant Syst. Evol.* **273**,  
715 257–271 (2008).
- 716 24. Al-Shehbaz, I. a. & O’Kane, S. L. Taxonomy and Phylogeny of *Arabidopsis*  
717 (Brassicaceae). *Arab. B.* **6**, 1–22 (2002).
- 718 25. Hu, T. T. *et al.* The *Arabidopsis lyrata* genome sequence and the basis of rapid genome  
719 size change. **43**, 476–481 (2011).
- 720 26. Lee, C.-R. *et al.* Young inversion with multiple linked QTLs under selection in a hybrid  
721 zone. *Nat. Ecol. Evol.* **1**, 0119 (2017).
- 722 27. Slotte, T. *et al.* The *Capsella rubella* genome and the genomic consequences of rapid  
723 mating system evolution. *Nat. Genet.* **45**, 831–5 (2013).
- 724 28. Kagale, S. *et al.* The emerging biofuel crop *Camelina sativa* retains a highly  
725 undifferentiated hexaploid genome structure. *Nat. Commun.* **5**, 3706 (2014).
- 726 29. Franzke, A., German, D., Al-Shehbaz, I. A. & Mummenhoff, K. *Arabidopsis* family ties:  
727 molecular phylogeny and age estimates in Brassicaceae. *Taxon* **58**, 425–427 (2009).
- 728 30. Koch, M., Haubold, B. & Mitchell-Olds, T. Molecular systematics of the brassicaceae:  
729 Evidence from coding plastidic matK and nuclear Chs sequences. *Am. J. Bot.* **88**, 534–544  
730 (2001).
- 731 31. Gan, X. *et al.* The *Cardamine hirsuta* genome offers insight into the evolution of  
732 morphological diversity. *Nat. Plants* **2**, 16167 (2016).
- 733 32. Yang, R. *et al.* The Reference Genome of the Halophytic Plant *Eutrema salsugineum*.  
734 *Front. Plant Sci.* **4**, 1–14 (2013).
- 735 33. De Smet, R. *et al.* Convergent gene loss following gene and genome duplications creates  
736 single-copy families in flowering plants. *Proc. Natl. Acad. Sci. U. S. A.* **110**, 2898–903  
737 (2013).
- 738 34. Duarte, J. M. *et al.* Identification of shared single copy nuclear genes in *Arabidopsis*,  
739 *Populus*, *Vitis* and *Oryza* and their phylogenetic utility across various taxonomic levels.  
740 *BMC Evol. Biol.* **10**, 61 (2010).
- 741 35. Emms, D. M. & Kelly, S. OrthoFinder: solving fundamental biases in whole genome  
742 comparisons dramatically improves orthogroup inference accuracy. *Genome Biol.* **16**, 157  
743 (2015).
- 744 36. Schranz, M. E., Windsor, A. J., Song, B.-H., Lawton-Rauh, A. & Mitchell-Olds, T.  
745 Comparative genetic mapping in *Boechera stricta*, a close relative of *Arabidopsis*. *Plant*  
746 *Physiol.* **144**, 286–98 (2007).
- 747 37. Bowers, J. L., Chapman, B. A., Rong, J. & Paterson, A. H. Unraveling angiosperms  
748 genome evolution by phylogenetic analysis of chromosomal duplications events. *Nature*  
749 **422**, 433–438 (2003).
- 750 38. Fontaine, M. C. *et al.* Extensive introgression in a malaria vector species complex  
751 revealed by phylogenomics. *Science (80-. )*. **347**, 1258522–1258522 (2015).
- 752 39. Lee-Yaw, J. A., Grassa, C. J., Joly, S., Andrew, R. L. & Rieseberg, L. H. An evaluation of  
753 alternative explanations for widespread cytonuclear discordance in annual sunflowers  
754 (*Helianthus*). *New Phytol.* (2018). doi:10.1111/nph.15386



- 755 40. Sanderson, M. J. Estimating Absolute Rates of Molecular Evolution and Divergence  
756 Times: A Penalized Likelihood Approach. *Mol. Biol. Evol.* **19**, 101–109 (2002).
- 757 41. Blake, J. A. *et al.* Gene ontology consortium: Going forward. *Nucleic Acids Res.* **43**,  
758 D1049–D1056 (2015).
- 759 42. Brandão, M. M., Dantas, L. L. & Silva-Filho, M. C. AtPIN: Arabidopsis thaliana protein  
760 interaction network. *BMC Bioinformatics* **10**, 454 (2009).
- 761 43. Song, B. H. *et al.* Multilocus patterns of nucleotide diversity, population structure and  
762 linkage disequilibrium in *Boechera stricta*, a wild relative of *Arabidopsis*. *Genetics* **181**,  
763 1021–1033 (2009).
- 764 44. Kim, S. *et al.* Recombination and linkage disequilibrium in *Arabidopsis thaliana*. *Nat.*  
765 *Genet.* **39**, 1151–1155 (2007).
- 766 45. Eriksson, A. & Manica, A. Effect of ancient population structure on the degree of  
767 polymorphism shared between modern human populations and ancient hominins. *Proc.*  
768 *Natl. Acad. Sci.* **109**, 13956–13960 (2012).
- 769 46. Lohse, K. & Frantz, L. A. F. Neandertal admixture in eurasia confirmed by maximum-  
770 likelihood analysis of three genomes. *Genetics* **196**, 1241–1251 (2014).
- 771 47. Wen, D., Yu, Y., Hahn, M. W. & Nakhleh, L. Reticulate evolutionary history and  
772 extensive introgression in mosquito species revealed by phylogenetic network analysis.  
773 *Mol. Ecol.* **25**, 2361–2372 (2016).
- 774 48. Martin, S. H., Davey, J. W. & Jiggins, C. D. Evaluating the use of ABBA-BABA statistics  
775 to locate introgressed loci. *Mol. Biol. Evol.* **32**, 244–257 (2015).
- 776 49. Plagnol, V. & Wall, J. D. Possible ancestral structure in human populations. *PLoS Genet.*  
777 **2**, (2006).
- 778 50. Orr, H. A. Dobzhansky, Bateson, and the genetics of speciation. *Genetics* **144**, 1331–1335  
779 (1996).
- 780 51. Goodstein, D. M. *et al.* Phytozome: A comparative platform for green plant genomics.  
781 *Nucleic Acids Res.* **40**, 1178–1186 (2012).
- 782 52. Katoh, K. & Standley, D. M. MAFFT multiple sequence alignment software version 7:  
783 Improvements in performance and usability. *Mol. Biol. Evol.* **30**, 772–780 (2013).
- 784 53. Zhang, Z. *et al.* ParaAT: A parallel tool for constructing multiple protein-coding DNA  
785 alignments. *Biochem. Biophys. Res. Commun.* **419**, 779–781 (2012).
- 786 54. Stamatakis, A. RAxML version 8: a tool for phylogenetic analysis and post-analysis of  
787 large phylogenies. *Bioinformatics* **30**, 1312–3 (2014).
- 788 55. Kim, D. *et al.* Transcript-level expression analysis of RNA-seq experiments with HISAT,  
789 StringTie and Ballgown. *Nat. Protoc.* **11**, 1650–1667 (2016).
- 790 56. Merchant, N. *et al.* The iPlant Collaborative: Cyberinfrastructure for Enabling Data to  
791 Discovery for the Life Sciences. *PLoS Biol.* **14**, 1–9 (2016).
- 792 57. Li, H. *et al.* The Sequence Alignment/Map format and SAMtools. *Bioinformatics* **25**,  
793 2078–2079 (2009).
- 794 58. Kears, M. *et al.* Geneious Basic: An integrated and extendable desktop software platform  
795 for the organization and analysis of sequence data. *Bioinformatics* **28**, 1647–1649 (2012).
- 796 59. Trapnell, C. *et al.* Transcript assembly and quantification by RNA-Seq reveals  
797 unannotated transcripts and isoform switching during cell differentiation. *Nat. Biotechnol.*  
798 **28**, 511–515 (2010).
- 799 60. Vaidya, G., Lohman, D. J. & Meier, R. SequenceMatrix: Concatenation software for the  
800 fast assembly of multi-gene datasets with character set and codon information. *Cladistics*

- 801           27, 171–180 (2011).
- 802 61. Paradis, E., Claude, J. & Strimmer, K. APE: Analyses of phylogenetics and evolution in R  
803 language. *Bioinformatics* **20**, 289–290 (2004).
- 804 62. Schliep, K. P. phangorn: Phylogenetic analysis in R. *Bioinformatics* **27**, 592–593 (2011).
- 805 63. Revell, L. J. phytools: An R package for phylogenetic comparative biology (and other  
806 things). *Methods Ecol. Evol.* **3**, 217–223 (2012).
- 807 64. Zheng, Y. & Janke, A. Gene flow analysis method, the D-statistic, is robust in a wide  
808 parameter space. *BMC Bioinformatics* **19**, 1–19 (2018).
- 809 65. Wen, D., Yu, Y., Hahn, M. W. & Nakhleh, L. SOM: Reticulate evolutionary history and  
810 extensive introgression in mosquito species revealed by phylogenetic network analysis.  
811 *Mol. Ecol.* **25**, 2361–2372 (2016).
- 812 66. Tung Ho, L. S. & Ané, C. A linear-time algorithm for gaussian and non-gaussian trait  
813 evolution models. *Syst. Biol.* **63**, 397–408 (2014).
- 814 67. Yang, Z. PAML 4: phylogenetic analysis by maximum likelihood. *Mol. Biol. Evol.* **24**,  
815 1586–91 (2007).
- 816 68. Newman, M. E. J. Mixing patterns in networks. *Phys. Rev. E* **67**, 026126 (2003).
- 817 69. Phanstiel, D. H., Boyle, A. P., Araya, C. L. & Snyder, M. P. Sushi.R: Flexible,  
818 quantitative and integrative genomic visualizations for publication-quality multi-panel  
819 figures. *Bioinformatics* **30**, 2808–2810 (2014).
- 820 70. Gentleman, R. *et al.* Bioconductor: open software development for computational biology  
821 and bioinformatics. *Genome Biol.* **5**, R80 (2004).
- 822 71. Alexander, P. J., Windham, M. D., Govindarajulu, R., Al-Shehbaz, I. a. & Bailey, C. D.  
823 Molecular Phylogenetics and Taxonomy of the Genus *Boechera* and Related Genera  
824 (*Brassicaceae*: *Boechereae*). *Syst. Bot.* **35**, 559–577 (2010).
- 825 72. Bailey, C. D., Al-shehbaz, I. A. & Rajanikanth, G. Generic Limits in Tribe Halimolobeae  
826 and Description of the New Genus *Exhalimolobos* (*Brassicaceae*). **32**, 140–156 (2017).
- 827 73. Slotte, T., Ceplitis, A., Neuffer, B., Hurka, H. & Lascoux, M. Intrageneric phylogeny of  
828 *Capsella* (*Brassicaceae*) and the origin of the tetraploid *C. bursa-pastoris* based on  
829 chloroplast and nuclear DNA sequences. *Am. J. Bot.* **93**, 1714–1724 (2006).
- 830 74. Galasso, I., Manca, A., Braglia, L., Ponzoni, E. & Breviario, D. Genomic fingerprinting of  
831 *Camelina* species using cTBP as molecular marker. *Am. J. Plant Sci.* **6**, 1184–1200  
832 (2015).
- 833 75. Copetti, D. *et al.* Extensive gene tree discordance and hemiplasy shaped the genomes of  
834 North American columnar cacti. *Proc. Natl. Acad. Sci.* **114**, 201706367 (2017).

835  
836 **Supplementary Information** is linked to the online version of the paper.

837 **Acknowledgments:** The data reported in this paper are provided in the Supplementary

838 Information. Scripts used to perform analyses are available at:

839 [https://github.com/EvanForsythe/Brassicaceae\\_phylogenomics](https://github.com/EvanForsythe/Brassicaceae_phylogenomics). This work was funded by NSF

840 grants 1409251, 1444490, and 1546825 to MAB. We thank M. J. Sanderson, M. M. McMahon,

841 E. Lyons, D.B. Sloan, M.P Simmons, R. N. Gutenkunst, A. E. Baniaga, and S. M. Lambert for

842 helpful discussions and M. T. Torabi, M. C. Borgstrom, and D. S. Clausen for statistical  
843 consultation. Finally, this work benefited greatly from input of the PaBeBaMo research group in  
844 the School of Plant Sciences, University of Arizona.

845 **Author Contributions:** E.S.F and M.A.B conceived the study. A.D.L.N performed organellar  
846 genome assembly. E.S.F performed all other analyses. E.S.F and M.A.B wrote the manuscript  
847 with input from A.D.L.N. All authors approved of manuscript before submission.

848 **Author Information:** The authors declare no competing financial interests. Correspondence and  
849 requests for materials should be addressed to M.A.B. at [mbeilstein@email.arizona.edu](mailto:mbeilstein@email.arizona.edu).

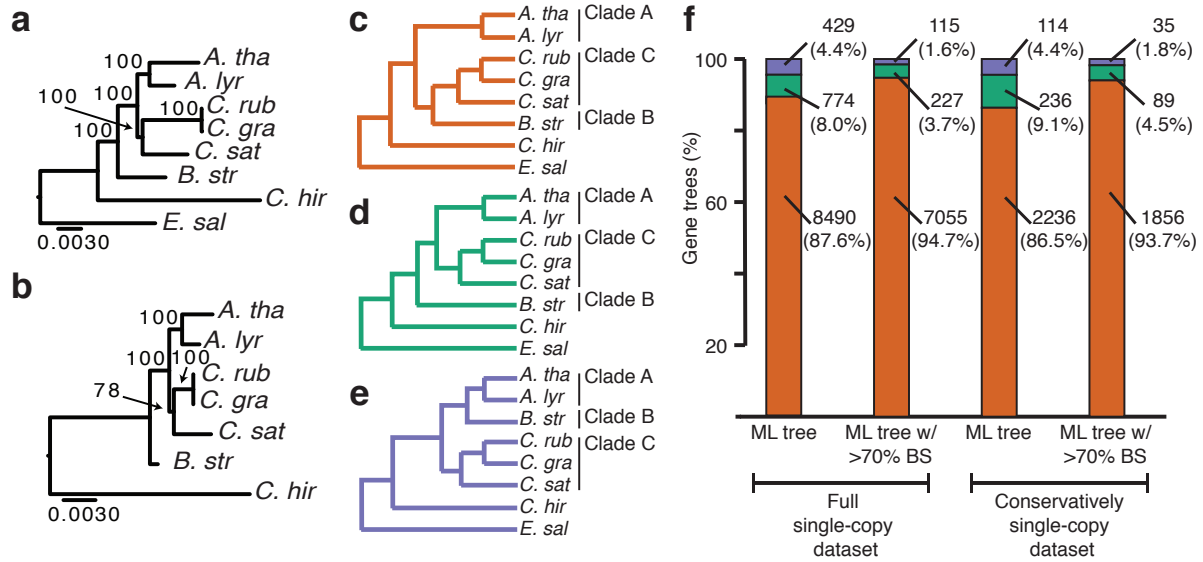

850  
851  
852  
853  
854  
855  
856  
857  
858

**Figure 1 | Incongruent gene tree topologies are observed within and between nuclear and organellar genomes.** **a.** Chloroplast and **b.** mitochondria ML trees with branch support from 100 bootstrap replicates. Scale bars represent mean substitutions/site. **c-f.** ML gene tree topologies inferred from nuclear single-copy genes rooted by *E. sal*. **c.** A(BC), **d.** B(AC) and **e.** C(AB) topologies. **f.** Numbers and frequencies of gene trees displaying A(BC) (orange), B(AC) (green), and C(AB) (purple). Single-copy genes are shown categorized by dataset and by level of bootstrap support.

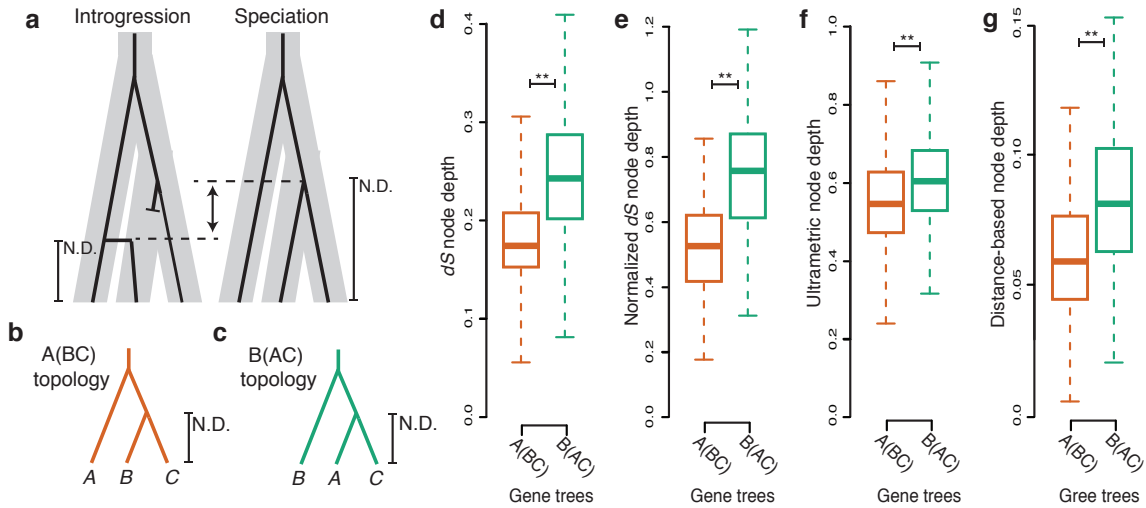

859  
860  
861  
862  
863  
864  
865  
866  
867  
868  
869  
870  
871

**Figure 2 | Node depths indicate extensive introgression led to transfer of nuclear genes. a.** Model depicting expected node depths (N.D.) for genes undergoing IG (left) or speciation (right). Speciation history is represented by thick grey bars. Individual gene histories are represented by black branches. Blunt ended branches represent a native allele that was replaced by an IG allele. Vertical arrow indicates expected difference in node depth. **b-c.** The informative node depths on A(BC) (**b**) and B(AC) (**c**) trees. **d-f.** Boxplots depicting observed median and quartile node depths measured from *dS* (**d**), normalized *dS* (**e**), ultrametric gene trees (**f**), and concordant windows within gene alignments (**g**).

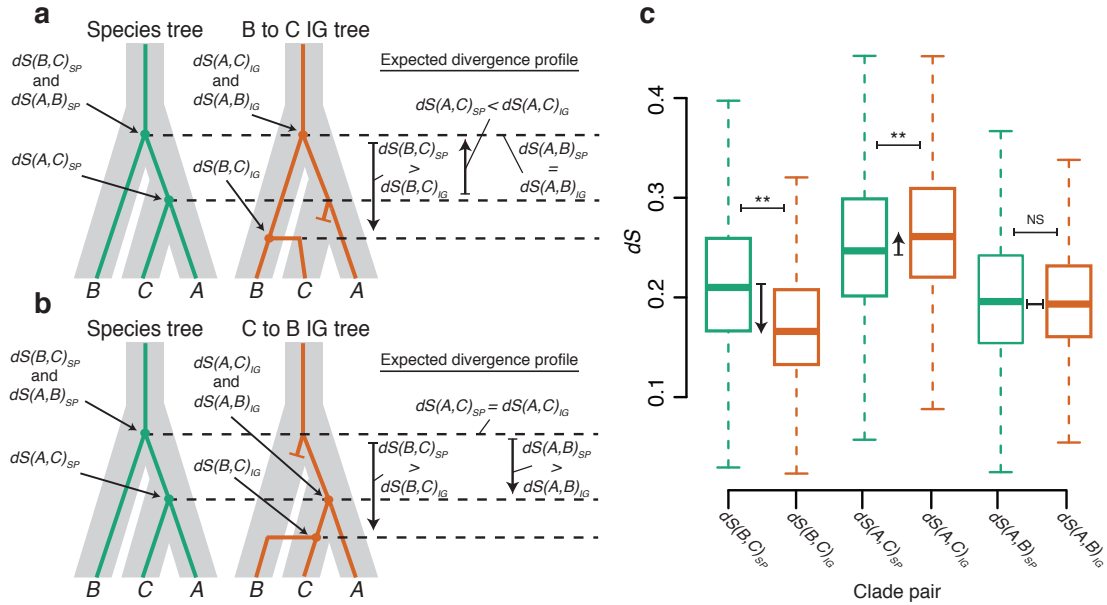

872  
 873 **Figure 3 | Unidirectional introgression led to transfer of nuclear genes from clade B to**  
 874 **clade C. a-b.** Model depicting pairwise  $dS$  divergence between clades A, B, and C. Arrows point  
 875 to nodes on the species tree (B(AC)) and the IG tree (A(BC)) indicated with  $SP$  and  $IG$   
 876 subscripts, respectively. Expected node depths under IG from clade B to clade C (**a**) or from  
 877 clade C to B (**b**). Vertical arrows depict expected differences between gene trees representing  
 878 speciation and IG. **c.** Observed  $dS$  distances on speciation gene trees (green boxes;  $dS(B,C)_{SP}$ ,  
 879  $dS(A,C)_{SP}$ , and  $dS(A,B)_{SP}$ ) and IG gene trees (orange boxes;  $dS(B,C)_{IG}$ ,  $dS(A,C)_{IG}$ , and  $dS(A,B)_{IG}$ ).  
 880 Arrows indicate observed differences between  $SP$  and  $IG$  comparing  $dS(B,C)$ ,  $dS(A,C)$ , and  
 881  $dS(A,B)$ . Horizontal bars above boxes in **c** represent distribution comparisons. \*\* $p < 0.01$ , NS  
 882  $p > 0.05$ .  
 883

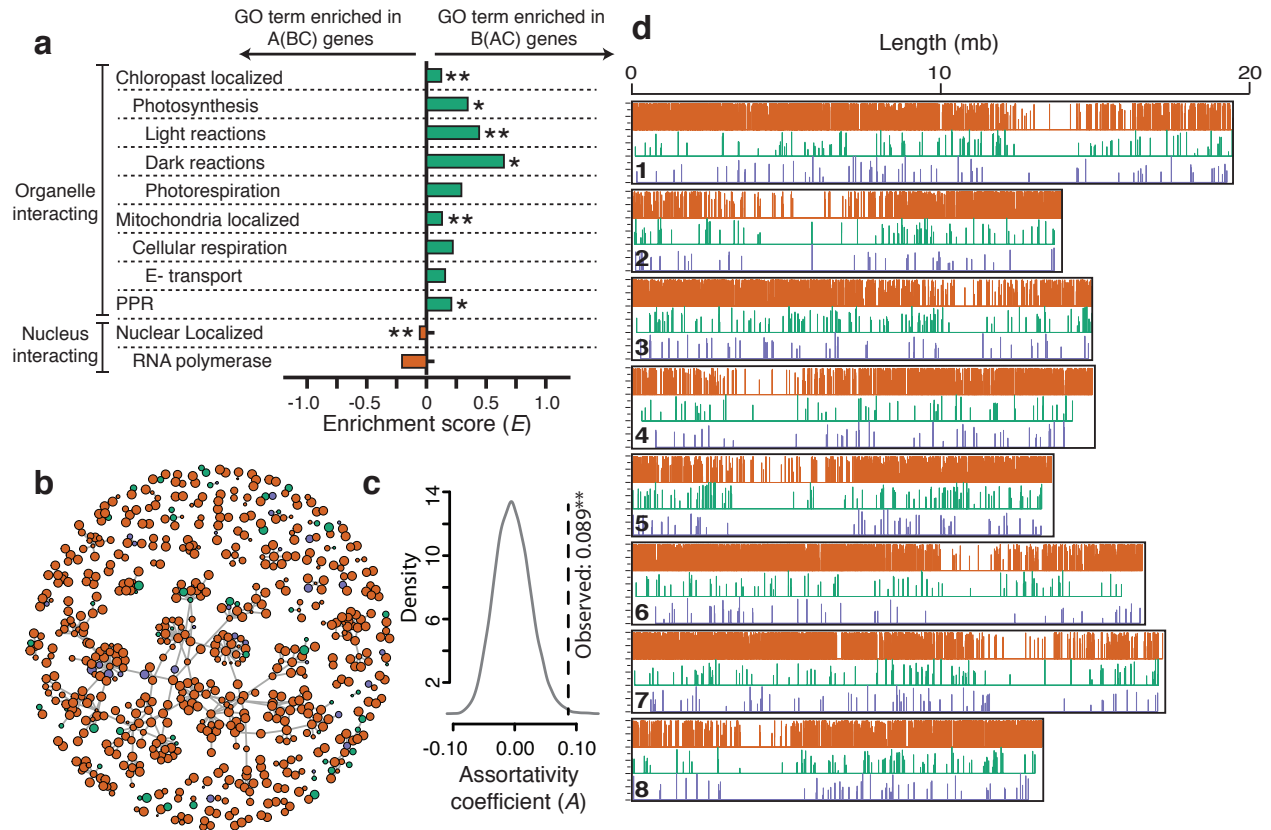

884

885 **Figure 4 | The genomic consequences of epistasis and genetic linkage during IG.**

886 **a.** Enrichment ( $E$ ) for GO terms = (% B(AC) genes – % A(BC) genes) / (% B(AC) + A(BC)

887 genes). **b.** Protein-protein interaction network for Arabidopsis protein complexes. Node fill, gene

888 tree topology; node diameters proportional to bootstrap support (Fig. S2a-c). **c.** Assortativity

889 coefficient ( $A$ ) of the network. Null distribution of  $A$  (grey curve); dotted line, observed  $A$ . **d.**

890 Nuclear genes mapped to *C. rubella*. Vertical lines, genes (colored by topology). Line heights

891 proportional to bootstrap support (Fig. S2a-c). \*\* $p < 0.01$ , \* $p < 0.05$ .

892

893

894
